# Supplementary material for: Analysis of Serum miRNA Profiles of Myasthenia Gravis Patients
Source: PLoS One. 2014 Mar 17;9(3):e91927. doi: 10.1371/journal.pone.0091927 (PMC3956820; doi:10.1371/journal.pone.0091927)
Supplement: Table S2 — Differential miRNA levels in the discovery cohort. miRNAs showing differences in a specific subgroup of MG are indicated in bold; Padj = P adjusted. (XLSX) [file pone.0091927.s002.xlsx]

## Sheet: Hoja1
Table S2. Differential miRNA levels in the discovery cohort
MG						EOMG						LOMG
Higher levels			Lower levels			Higher levels			Lower levels			Higher levels			Lower levels
miRNA	padj value	Fold change	miRNA	padj value	Fold change	miRNA	padj value	Fold change	miRNA	padj value	Fold change	miRNA	padj value	Fold change	miRNA	padj value	Fold change
miR-520d-5p	p=0.004	5.54856	miR24	p=0.004	-4.38542	miR-520d-5p	p=0.016	7.82181	miR-193a-5p	p=0.016	-73.1256	miR-520d-5p	p=0.004	10.2019	miR-375	p<0.001	-522.647
miR-548c	p=0.004	5.84012	miR25	p=0.004	-4.35484	miR-523	p=0.024	7.49152	miR-130b	p=0.016	-63.5178	miR-548c	p=0.010	7.40232	miR-122	p<0.001	-311.046
miR-548a	p=0.007	6.15422	miR29c	p=0.004	-9.54395	miR-548c	p=0.020	5.95841	miR-93	p=0.016	-10.2391	miR-548a	p=0.014	9.15129	miR-185	p=0.002	-32.4469
miR-523	p=0.012	5.34245	miR93	p=0.004	-7.86076	miR-548a	p=0.034	5.91123	miR-25	p=0.016	-6.07828	miR-523	p=0.029	7.12608	miR-140-3p	p=0.004	-60.598
miR-518d	p=0.035	6.44687	miR140-3p	p=0.004	-28.6206	miR-518d	p=0.045	10.7498	let7g	p=0.020	-103.577				miR-130b	p=0.013	-51.2745
			miR140	p=0.004	-8.67066				miR-192	p=0.020	-57.6247				miR-885-5p	p=0.014	-148.664
			miR193a	p=0.004	-27.7449				miR-29c	p=0.020	-9.40078				miR-193a-5p	p=0.023	-26.5847
			let-7b	p=0.004	-13.6926				miR-24	p=0.022	-4.84852				miR-29c	p=0.029	-7.84819
			miR-324-3p	p=0.008	-21.4193				miR-15b	p=0.023	-37.1287				miR-25	p=0.032	-4.25716
			miR-20b	p=0.010	-4.40857				let-7b	p=0.025	-13.8918				miR-93	p=0.032	-6.66771
			miR-16	p=0.012	-4.14564				let-7e	p=0.025	-7.38258				miR-486	p=0.032	-57.6926
			mir-20a	p=0.014	-3.70464				miR-221	p=0.025	-195.216				miR-324-3p	p=0.034	-23.4742
			miR-130b	p=0.014	-15.5936				miR-652	p=0.027	-26.6908				let-7b	p=0.034	-11.7546
			miR-221	p=0.014	-81.0391				miR-345	p=0.027	-21.1649				miR-16	p=0.042	-4.36406
			miR-375	p=0.014	-21.1154				miR-20b	p=0.033	-4.48001
			miR-652	p=0.015	-15.2919				miR-140	p=0.034	-7.25349
			miR-345	p=0.017	-11.8199				miR-331	p=0.034	-4.34053
			miR-15b	p=0.020	-14.3673
			miR-192	p=0.020	-16.6417
			let-7g	p=0.022	-21.749
			miR-122	p=0.022	-13.4484
			miR-331	p=0.029	-3.11476
			miR199a-3p	p=0.030	-4.22258
			miR185	p=0.035	-4.98521
			miR-125a-5p	p=0.036	-7.75142
			miR-885-5p	p=0.036	-19.9555
			miR-425-5p	p=0.036	-11.9814
miRNAs showing differences in a specific subgroup of MG are indicated in bold; Padj = P adjusted
